# Supplementary material for: Genome Size, Cytotype Diversity and Reproductive Mode Variation of Cotoneaster integerrimus (Rosaceae) from the Balkans
Source: MDPI journal article supplement (doi:10.3390/plants10122798), 2021-12-17
Supplement: s1 [file s1]

Table S2. Genome composition of the studied *Cotoneaster integerrimus* individuals at five microsatellite loci. The numbers in columns denote allele sizes at each locus; MLG - multilocus genotype.

| Site ID: individual ID numbers                                                                                                                                                  | Number of individuals sharing the MLG | Ploidy level | Microsatellite loci |     |     |     |         |     |     |     |         |     |     |       |     |     |     |         |     |     |     |     |
|---------------------------------------------------------------------------------------------------------------------------------------------------------------------------------|---------------------------------------|--------------|---------------------|-----|-----|-----|---------|-----|-----|-----|---------|-----|-----|-------|-----|-----|-----|---------|-----|-----|-----|-----|
|                                                                                                                                                                                 |                                       |              | MSS5                |     |     |     | CH01F02 |     |     |     | CH02D11 |     |     | MSS16 |     |     |     | CH01H10 |     |     |     |     |
| Go: 1, 6, 8, 11, 12, 13, 14, 16, 19                                                                                                                                             | 9                                     | 4x           | 134                 | 140 | 142 | 146 | 198     | 212 | 214 | 216 | 159     | 161 |     |       | 152 | 154 | 158 | 176     | 106 | 108 | 116 |     |
| Go: 15                                                                                                                                                                          | 1                                     | 4x           | 134                 | 140 | 142 | 146 | 198     | 212 | 214 |     | 169     | 171 |     |       | 152 | 154 | 158 | 176     | 106 | 110 | 116 |     |
| Bg: 1, 2, 3, 4, 5, 6, 8, 9, 10, 11, 12, 13, 14, 15, 16, 17, 18, 19, 20, 21, 3; Vo: 11; Go: 3, 4, 5, 7, 9, 10, 17, 18, 20; Ru: 6, 7, 9, 11, 13, 15, 18, 19, 20; So: 4, 7.; Um: 8 | 43                                    | 4x           | 118                 | 132 | 142 | 146 | 204     | 208 | 212 |     | 169     | 171 |     |       | 152 | 154 | 158 | 176     | 108 | 114 | 124 |     |
| Um: 1                                                                                                                                                                           | 1                                     | 2x           | 134                 | 156 |     |     | 214     |     |     |     | 167     |     |     |       | 156 | 158 |     |         | 116 | 128 |     |     |
| Um: 2                                                                                                                                                                           | 1                                     | 4x           | 134                 | 140 | 142 | 148 | 198     | 204 | 212 | 216 | 161     | 167 |     |       | 160 | 162 | 166 | 180     | 106 | 108 | 110 |     |
| Um: 6, 17                                                                                                                                                                       | 2                                     | 4x           | 134                 | 140 | 142 | 148 | 198     | 204 | 212 | 216 | 161     | 167 |     |       | 160 | 162 |     |         | 108 | 114 |     |     |
| Um: 3                                                                                                                                                                           | 1                                     | 2x           | 140                 | 152 |     |     | 214     | 218 |     |     | 173     |     |     |       | 154 | 184 |     |         | 104 |     |     |     |
| Um: 4                                                                                                                                                                           | 1                                     | 3x           | 134                 | 138 | 146 |     | 206     | 216 |     |     | 159     | 161 | 177 |       | 160 | 162 |     |         | 104 | 110 | 114 |     |
| Um: 5                                                                                                                                                                           | 1                                     | 3x           | 134                 | 150 | 156 |     | 198     | 214 |     |     | 161     |     |     |       | 154 | 176 |     |         | 100 | 110 |     |     |
| Um: 7                                                                                                                                                                           | 1                                     | 3x           | 132                 | 142 | 156 |     | 204     |     |     |     | 167     | 177 |     |       | 154 | 166 | 178 |         | 104 | 112 | 120 |     |
| Um: 10                                                                                                                                                                          | 1                                     | 2x           | 130                 | 146 |     |     | 212     |     |     |     | 169     |     |     |       | 158 | 160 |     |         | 106 |     |     |     |
| Um: 11                                                                                                                                                                          | 1                                     | 2x           | 124                 | 148 |     |     | 210     |     |     |     | 169     |     |     |       | 154 | 156 |     |         | 110 |     |     |     |
| Um: 12                                                                                                                                                                          | 1                                     | 4x           | 132                 | 140 |     |     | 198     | 204 | 212 | 220 | 161     | 167 |     |       | 160 | 162 | 166 | 180     | 108 | 112 |     |     |
| Um: 14                                                                                                                                                                          | 1                                     | 4x           | 134                 | 140 | 142 | 148 | 198     | 204 | 212 | 216 | 161     | 167 |     |       | 158 | 160 | 166 | 178     | 110 | 112 |     |     |
| Um: 15                                                                                                                                                                          | 1                                     | 2x           | 132                 | 136 |     |     | 204     | 214 |     |     | 167     | 189 |     |       | 154 |     |     |         | 118 |     |     |     |
| Um: 19; So: 1, 2, 3, 16; Vr: 6, 12, 13                                                                                                                                          | 8                                     | 4x           | 142                 | 146 | 150 |     | 204     | 206 | 212 |     | 169     |     |     |       | 154 | 156 | 160 | 176     | 108 | 112 | 114 | 122 |
| Um: 21                                                                                                                                                                          | 1                                     | 3x           | 136                 | 138 | 142 |     | 212     | 214 | 216 |     | 161     | 183 |     |       | 154 | 158 | 178 |         | 110 | 112 | 114 |     |
| Um:1B                                                                                                                                                                           | 1                                     | 2x           | 116                 | 136 |     |     | 210     | 220 |     |     | 167     | 171 |     |       | 154 |     |     |         | 100 | 108 |     |     |
| Um: 2B                                                                                                                                                                          | 1                                     | 2x           | 146                 |     |     |     | 204     | 218 |     |     | 163     | 179 |     |       | 156 |     |     |         | 110 | 112 |     |     |
| Um: 3B                                                                                                                                                                          | 1                                     | 2x           | 156                 | 164 |     |     | 214     |     |     |     | 167     | 185 |     |       | 160 | 184 |     |         | 126 | 128 |     |     |
| Um: 4B                                                                                                                                                                          | 1                                     | 2x           | 146                 |     |     |     | 214     | 220 |     |     | 169     | 171 |     |       | 154 |     |     |         | 104 | 128 |     |     |
| Um: 5B                                                                                                                                                                          | 1                                     | 4x           | 134                 | 138 | 142 | 148 | 198     | 204 | 212 | 216 | 161     | 167 |     |       | 158 | 160 | 166 | 178     | 106 | 110 |     |     |
| Um: 7B                                                                                                                                                                          | 1                                     | 2x           | 132                 | 136 |     |     | 202     | 204 |     |     | 163     | 173 |     |       | 154 |     |     |         | 102 | 118 |     |     |
| Um: 8B                                                                                                                                                                          | 1                                     | 2x           | 118                 | 136 |     |     | 210     | 220 |     |     | 167     | 171 |     |       | 154 |     |     |         | 100 | 108 |     |     |
| Vr: 1, 2, 3, 4, 7, 8                                                                                                                                                            | 6                                     | 4x           | 134                 | 140 | 142 | 148 | 198     | 204 | 212 | 216 | 161     | 167 |     |       | 158 | 160 | 166 | 176     | 108 | 112 |     |     |
| Vr: 5                                                                                                                                                                           | 1                                     | 4x           | 118                 | 132 | 142 | 146 | 204     | 208 | 212 |     | 161     | 167 |     |       | 158 | 160 | 166 | 176     | 108 | 114 |     |     |
| Vr: 9                                                                                                                                                                           | 1                                     | 4x           | 140                 | 146 |     |     | 204     | 208 | 214 | 216 | 161     | 167 |     |       | 154 | 156 | 166 | 176     | 108 | 112 | 116 |     |
| Vr: 10                                                                                                                                                                          | 1                                     | 4x           | 134                 | 144 | 146 |     | 212     | 214 | 216 | 226 | 161     | 167 |     |       | 154 | 156 | 160 | 166     | 106 | 116 |     |     |
| Vr: 14                                                                                                                                                                          | 1                                     | 4x           | 134                 | 140 | 142 | 148 | 198     | 204 | 212 | 216 | 161     | 167 |     |       | 160 | 162 | 166 | 176     | 106 | 110 |     |     |
| Vr: 15, 16, 17, 18, 19                                                                                                                                                          | 5                                     | 4x           | 134                 | 140 | 142 | 148 | 198     | 204 | 212 | 216 | 161     | 167 |     |       | 160 | 162 | 166 | 176     | 108 | 112 |     |     |

|                                                                                              |    |    |     |     |     |     |     |     |     |     |     |     |     |     |     |     |     |     |     |
|----------------------------------------------------------------------------------------------|----|----|-----|-----|-----|-----|-----|-----|-----|-----|-----|-----|-----|-----|-----|-----|-----|-----|-----|
| <b>Bo:</b> 1, 4, 6, 7, 8, 15, 16                                                             | 7  | 4x | 142 | 146 | 148 | 152 | 204 | 206 | 212 | 169 | 173 | 152 | 154 | 158 | 176 | 108 | 110 | 114 | 122 |
| <b>Bo:</b> 3, 9, 14                                                                          | 3  | 4x | 142 | 146 | 148 | 150 | 204 | 206 | 212 | 169 | 173 | 152 | 154 | 158 | 176 | 110 | 112 | 114 | 120 |
| <b>Bo:</b> 5, 10, 18                                                                         | 3  | 4x | 142 | 146 | 148 | 152 | 204 | 206 | 212 | 169 | 173 | 152 | 154 | 158 | 176 | 108 | 110 | 114 | 118 |
| <b>Bo:</b> 11, 17                                                                            | 2  | 4x | 140 | 146 | 148 | 152 | 204 | 206 | 212 | 169 | 173 | 152 | 154 | 158 | 176 | 108 | 110 | 114 | 120 |
| <b>Bo:</b> 19                                                                                | 1  | 4x | 142 | 144 | 146 |     | 204 | 206 | 212 | 169 | 173 | 152 | 154 | 158 | 176 | 108 | 110 | 114 | 118 |
| <b>Ru:</b> 1, 2, 3, 4, 5, 14, 16                                                             | 7  | 4x | 142 | 146 | 148 |     | 204 | 208 | 212 | 169 | 171 | 152 | 154 | 158 | 176 | 108 | 112 | 114 | 120 |
| <b>Ru:</b> 8                                                                                 | 1  | 4x | 118 | 132 | 142 | 146 | 204 | 208 | 212 | 169 | 171 | 152 | 176 | 182 |     | 108 | 112 | 114 | 120 |
| <b>Ru:</b> 17                                                                                | 1  | 4x | 142 | 146 | 148 |     | 204 | 208 | 212 | 169 | 171 | 158 | 160 | 176 |     | 108 | 112 | 122 |     |
| <b>Bg:</b> 7                                                                                 | 1  | 4x | 124 | 132 | 142 | 146 | 204 | 208 | 212 | 169 | 171 | 154 | 156 | 160 | 176 | 108 | 114 |     |     |
| <b>So:</b> 5, 9, 10, 11, 13                                                                  | 5  | 4x | 118 | 132 | 142 | 146 | 204 | 208 | 212 | 169 | 171 | 152 | 154 | 158 | 176 | 108 | 114 |     |     |
| <b>So:</b> 6                                                                                 | 1  | 4x | 142 | 146 | 150 |     | 204 | 206 | 212 | 169 | 173 | 154 | 156 | 160 | 176 | 108 | 110 |     |     |
| <b>So:</b> 7                                                                                 | 1  | 4x | 130 | 146 |     |     | 204 | 212 | 216 | 169 | 173 | 154 | 156 | 160 | 176 | 108 | 110 |     |     |
| <b>So:</b> 14                                                                                | 1  | 3x | 136 | 146 | 150 |     | 204 | 206 | 212 | 169 | 171 | 154 | 156 | 176 |     | 106 | 112 |     |     |
| <b>Pu:</b> 1, 3, 4, 5, 6, 7, 8, 9, 10, 11, 12, 13, 14, 15, 16, 17, 18, 19, 20; <b>Ca:</b> 20 | 20 | 4x | 134 | 140 | 142 | 146 | 198 | 204 | 212 | 214 | 159 | 161 | 154 | 156 | 160 | 176 | 104 | 108 |     |
| <b>Ca:</b> 2                                                                                 | 1  | 4x | 134 | 140 | 148 |     | 198 | 204 | 212 | 216 | 159 | 167 | 156 | 160 | 166 | 176 | 106 | 110 |     |
| <b>Ca:</b> 3, 4, 5, 6, 7, 8, 9, 10, 11, 12, 13, 14, 16, 17, 18, 19, 3                        | 17 | 4x | 134 | 140 | 148 |     | 198 | 204 | 212 | 216 | 159 | 167 | 158 | 162 | 166 | 176 | 106 | 110 |     |
| <b>Ca:</b> 15                                                                                | 1  | 4x | 118 | 130 | 140 | 148 | 198 | 204 | 212 | 216 | 161 | 167 | 158 | 162 | 166 | 176 | 106 | 110 |     |
| <b>Ca:</b> 21                                                                                | 1  | 4x | 134 | 140 | 142 | 146 | 198 | 204 | 212 | 214 | 159 | 161 | 154 | 156 | 160 | 176 | 104 | 108 | 114 |
| <b>De:</b> 1, 2                                                                              | 2  | 4x | 118 | 130 | 134 | 142 | 200 | 204 | 206 | 216 | 161 | 167 | 154 | 160 |     |     | 106 | 110 | 116 |
| <b>De:</b> 3, 4, 6, 8, 9, 10, 11, 12, 14, 15, 20                                             | 11 | 4x | 132 | 142 | 148 | 156 | 204 | 216 |     |     | 165 | 177 | 154 | 158 | 166 | 178 | 104 | 112 | 118 |
| <b>De:</b> 5                                                                                 | 1  | 4x | 118 | 130 | 140 | 142 | 204 |     |     |     | 161 | 167 | 154 | 160 |     |     | 106 | 110 | 116 |
| <b>De:</b> 7, 13, 21                                                                         | 3  | 4x | 134 | 140 | 146 | 150 | 198 | 206 | 216 |     | 161 | 177 | 162 |     |     |     | 106 | 116 |     |
| <b>De:</b> 16                                                                                | 1  | 2x | 138 | 146 |     |     | 204 | 216 |     |     | 161 | 173 | 156 |     |     |     | 104 | 118 |     |
| <b>De:</b> 19                                                                                | 1  | 4x | 132 | 142 | 148 | 156 | 204 | 216 |     |     | 165 | 177 | 154 | 158 | 166 | 178 | 104 | 120 |     |
| <b>Rt:</b> 1, 2, 3, 10                                                                       | 4  | 4x | 130 | 132 | 148 | 152 | 204 | 214 | 220 |     | 165 | 175 | 156 | 158 | 176 |     | 104 | 112 | 124 |
| <b>Rt:</b> 4, 5, 6                                                                           | 3  | 4x | 130 | 132 | 154 |     | 198 | 214 | 220 | 226 | 153 | 159 | 154 | 166 | 178 |     | 108 | 112 | 118 |
| <b>Rt:</b> 7                                                                                 | 1  | 4x | 144 | 150 |     |     | 204 | 208 | 214 | 222 | 161 | 163 | 156 |     |     |     | 104 | 108 |     |
| <b>Rt:</b> 9                                                                                 | 1  | 3x | 116 | 132 | 142 |     | 204 | 208 | 212 |     | 161 | 163 | 154 |     |     |     | 104 | 108 |     |
| <b>Mu:</b> 1, 3, 5, 6, 7                                                                     | 5  | 4x | 124 | 140 | 152 |     | 194 | 204 | 212 |     | 153 | 175 | 154 | 180 |     |     | 106 | 112 | 120 |
| <b>Mu:</b> 2, 4                                                                              | 2  | 4x | 126 | 132 | 140 | 150 | 198 | 204 | 214 | 220 | 151 | 175 | 154 | 156 | 164 | 176 | 108 | 110 | 112 |
| <b>Vo:</b> 1, 3, 7, 8, 9, 10                                                                 | 6  | 4x | 144 | 146 | 148 |     | 204 | 206 | 212 |     | 169 | 173 | 154 | 156 | 160 | 176 | 106 | 110 | 114 |
| <b>Vo:</b> 5                                                                                 | 1  | 4x | 150 | 152 | 154 | 156 | 204 | 208 | 212 |     | 169 | 173 | 154 | 158 | 176 |     | 106 |     |     |
| <b>Vo:</b> 6                                                                                 | 1  | 3x | 116 | 132 | 142 |     | 204 | 208 | 212 |     | 169 | 173 | 154 | 158 | 176 |     | 106 |     |     |
| <b>Vo:</b> 11                                                                                | 1  | 4x | 142 | 146 |     |     | 204 | 206 | 212 |     | 169 | 173 | 154 | 156 | 160 | 176 | 104 | 106 | 112 |
| <b>Si:</b> 1, 2, 3, 4, 5                                                                     | 5  | 4x | 140 | 144 | 146 | 150 | 204 | 216 | 218 |     | 137 | 161 | 158 | 162 | 166 |     | 102 |     |     |
| <b>Pr:</b> 1                                                                                 | 1  | 3x | 134 | 138 | 140 |     | 198 | 204 | 214 |     | 159 | 161 | 154 | 160 | 178 |     | 108 |     |     |
| <b>Pr:</b> 2, 4                                                                              | 2  | 4x | 132 | 140 | 146 | 156 | 212 | 214 | 216 | 222 | 161 | 163 | 156 | 160 | 162 |     | 98  |     |     |
| <b>Pr:</b> 3                                                                                 | 1  | 3x | 134 | 138 | 142 |     | 198 | 204 | 216 |     | 159 | 161 | 154 | 160 | 178 |     | 106 |     |     |

|                   |   |    |     |     |     |     |     |     |     |     |     |     |     |     |     |     |     |     |     |     |     |
|-------------------|---|----|-----|-----|-----|-----|-----|-----|-----|-----|-----|-----|-----|-----|-----|-----|-----|-----|-----|-----|-----|
| He: 1, 2, 3, 4, 5 | 5 | 4x | 126 | 128 | 134 |     | 198 | 204 | 212 | 218 | 155 | 159 |     | 154 | 164 | 172 | 174 | 84  |     |     |     |
|                   | 1 | 4x | 130 | 140 | 142 | 146 | 198 | 202 | 212 | 218 | 163 | 165 | 167 | 156 | 160 | 162 | 166 | 104 | 106 | 110 |     |
| Ro: 2, 4, 5       | 3 | 4x | 130 | 140 | 144 |     | 198 | 204 | 212 | 218 | 165 | 169 |     | 156 | 160 | 162 | 166 | 104 | 106 | 110 |     |
| Ro: 3             | 1 | 4x | 132 | 140 | 146 | 156 | 202 | 212 | 214 | 222 | 161 | 163 | 167 | 156 | 160 | 162 |     | 98  | 104 | 106 |     |
| Mo: 1, 3          | 2 | 4x | 128 | 132 | 136 |     | 194 | 198 | 204 | 214 | 153 | 175 |     | 154 | 166 | 178 | 194 | 104 | 108 | 112 | 122 |
| Mo: 2             | 1 | 4x | 134 | 138 | 144 | 152 | 198 | 204 | 212 | 216 | 163 | 169 |     | 156 | 160 | 162 | 176 | 102 | 104 | 106 | 114 |
| Mo: 4             | 1 | 4x | 134 | 138 | 144 | 152 | 198 | 204 | 212 | 216 | 163 | 169 | 171 | 160 | 162 | 176 | 192 | 102 | 106 | 116 |     |
| Su: 1             | 1 | 4x | 118 | 132 | 140 | 142 | 202 | 206 | 210 | 230 | 139 | 161 | 185 | 156 | 160 | 176 | 188 | 112 | 114 | 126 |     |
| Su: 2             | 1 | 4x | 118 | 132 | 140 | 142 | 202 | 206 | 210 | 230 | 139 | 151 | 163 | 181 | 158 | 164 | 180 | 108 | 112 | 124 |     |
| Su: 3             | 2 | 4x | 118 | 134 | 140 | 146 | 202 | 206 | 210 | 220 | 139 | 161 | 185 | 156 | 160 | 176 | 188 | 112 | 114 | 122 |     |
| Su: 4, 5          | 1 | 4x | 118 | 132 | 140 | 142 | 202 | 206 | 210 | 230 | 139 | 161 | 185 | 199 | 156 | 160 | 176 | 188 | 112 | 114 | 126 |
| Su: 6, 7          | 1 | 4x | 118 | 132 | 142 | 146 | 202 | 206 | 210 | 230 | 139 | 163 |     | 156 | 180 |     |     | 106 | 112 | 124 |     |
| Ol: 1             | 1 | 4x | 118 | 132 | 140 | 142 | 202 | 206 | 210 | 230 | 159 | 191 | 193 | 197 | 156 | 194 |     | 104 | 112 |     |     |
| Ol: 2             | 1 | 4x | 118 | 132 | 142 | 144 | 202 | 206 | 210 | 230 | 197 | 199 |     | 156 |     |     |     | 110 | 114 |     |     |
| Ol: 3             | 1 | 4x | 118 | 132 | 140 | 142 | 202 | 206 | 210 | 230 | 139 | 151 | 181 | 156 |     |     |     | 114 |     |     |     |
| Ol: 4, 5          | 2 | 4x | 118 | 132 | 142 | 144 | 202 | 206 | 210 | 230 | 139 | 159 |     | 154 | 156 |     |     | 122 |     |     |     |
| Pa: 1             | 1 | 4x | 118 | 132 | 142 | 146 | 202 | 206 | 210 | 230 | 131 | 175 | 191 | 156 | 160 | 180 |     | 110 | 122 |     |     |
| Pa: 2             | 1 | 4x | 118 | 132 | 142 | 146 | 202 | 206 | 210 | 230 | 139 | 175 | 191 | 156 | 160 | 180 |     | 106 | 114 | 122 |     |
| Pa: 3             | 1 | 4x | 118 | 132 | 142 | 146 | 202 | 206 | 210 | 230 | 177 |     |     | 160 | 194 |     |     | 110 | 112 | 116 |     |
| Pa: 4, 5          | 2 | 4x | 118 | 132 | 144 | 152 | 202 | 206 | 210 | 230 | 157 | 163 | 217 | 154 | 156 | 170 | 190 | 110 | 112 | 120 |     |
