# Supplementary material for: Genome Size, Cytotype Diversity and Reproductive Mode Variation of Cotoneaster integerrimus (Rosaceae) from the Balkans
Source: MDPI journal article supplement (doi:10.3390/plants10122798), 2021-12-17
Supplement: s1 [file s1]

Table S1. Flow cytometric seed screening results for *Cotoneaster integerrimus* populations.

| Site         | Site ID_Mother number_Seed number | Mother ploidy | Genome size of embryo (pg) | Ratio of endosperm and standard fluorescence | Genome size of endosperm (pg) | Embryo ploidy | Endosperm ploidy |
|--------------|-----------------------------------|---------------|----------------------------|----------------------------------------------|-------------------------------|---------------|------------------|
| Borova glava | Bg_13_9                           | 4x            | 2,54                       | 3,84                                         | 3,76                          | 4x            | 6x               |
|              | Bg_13_10                          | 4x            | 3,62                       | 6,24                                         | 6,12                          | 6x            | 10x              |
|              | Bg_13_11                          | 4x            | 2,41                       | 7,64                                         | 7,48                          | 4x            | 12x              |
|              | Bg_13_12                          | 4x            | 2,50                       | 6,41                                         | 6,28                          | 4x            | 10x              |
|              | Bg_13_13                          | 4x            | 2,51                       | 7,74                                         | 7,59                          | 4x            | 12x              |
|              | Bg_13_14                          | 4x            | 2,45                       | 6,43                                         | 6,30                          | 4x            | 10x              |
|              | Bg_13_15                          | 4x            | 2,58                       | 6,32                                         | 6,19                          | 4x            | 10x              |
|              | Bg_13_17                          | 4x            | 2,42                       | 3,70                                         | 3,63                          | 4x            | 6x               |
|              | Bg_13_18                          | 4x            | 2,51                       | 4,76                                         | 4,67                          | 4x            | 7x               |
|              | Bg_13_19                          | 4x            | 2,48                       | 7,74                                         | 7,59                          | 4x            | 12x              |
|              | Bg_13_20                          | 4x            | 2,68                       | 8,05                                         | 7,89                          | 4x            | 12x              |
|              | Bg_13_21                          | 4x            | 2,62                       | 7,95                                         | 7,79                          | 4x            | 12x              |
|              | Bg_13_22                          | 4x            | 2,41                       | 4,64                                         | 4,54                          | 4x            | 8x               |
|              | Bg_13_23                          | 4x            | 2,55                       | 7,84                                         | 7,68                          | 4x            | 12x              |
|              | Bg_15_1                           | 4x            | 2,54                       | 6,42                                         | 6,29                          | 4x            | 10x              |
|              | Bg_15_2                           | 4x            | 2,51                       | 6,51                                         | 6,38                          | 4x            | 10x              |
|              | Bg_15_3                           | 4x            | 3,92                       | 6,68                                         | 6,55                          | 6x            | 10x              |
|              | Bg_15_4                           | 4x            | 2,64                       | 8,01                                         | 7,85                          | 4x            | 12x              |
|              | Bg_15_5                           | 4x            | 2,62                       | 6,68                                         | 6,55                          | 4x            | 10x              |
|              | Bg_15_6                           | 4x            | 2,51                       | 6,60                                         | 6,47                          | 4x            | 10x              |
|              | Bg_15_7                           | 4x            | 2,54                       | 7,86                                         | 7,70                          | 4x            | 12x              |
|              | Bg_15_8                           | 4x            | 2,61                       | 7,84                                         | 7,69                          | 4x            | 12x              |
|              | Bg_15_9                           | 4x            | 2,48                       | 7,09                                         | 6,95                          | 4x            | 11x              |
|              | Bg_6_1A                           | 4x            | 2,44                       | 3,95                                         | 3,87                          | 4x            | 6x               |
|              | Bg_6_1                            | 4x            | 2,61                       | 5,03                                         | 4,93                          | 4x            | 8x               |
|              | Bg_6_2                            | 4x            | 2,51                       | 3,95                                         | 3,87                          | 4x            | 6x               |
|              | Bg_6_3                            | 4x            | 2,61                       | 7,83                                         | 7,67                          | 4x            | 12x              |
|              | Bg_6_4                            | 4x            | 2,63                       | 3,90                                         | 3,83                          | 4x            | 6x               |
|              | Bg_7_1                            | 2x            | 1,23                       | 1,99                                         | 1,95                          | 2x            | 3x               |
|              | Bg_7_2                            | 2x            | 1,28                       | 1,98                                         | 1,94                          | 2x            | 3x               |
|              | Bg_7_3                            | 2x            | 1,27                       | 1,99                                         | 1,95                          | 2x            | 3x               |
|              | Bg_8_4                            | 4x            | 2,55                       | 6,40                                         | 6,27                          | 4x            | 10x              |
|              | Bg_8_4                            | 4x            | 2,64                       | 4,05                                         | 3,97                          | 4x            | 6x               |
| Bosiljna     | Bo_3_2                            | 4x            | 2,55                       | 7,74                                         | 7,59                          | 4x            | 12x              |
|              | Bo_3_3                            | 4x            | 2,58                       | 7,95                                         | 7,79                          | 4x            | 12x              |
|              | Bo_3_5                            | 4x            | 2,51                       | 7,74                                         | 7,59                          | 4x            | 12x              |
|              | Bo_3_6                            | 4x            | 2,58                       | 7,84                                         | 7,69                          | 4x            | 12x              |
|              | Bo_3_8                            | 4x            | 2,54                       | 7,85                                         | 7,69                          | 4x            | 12x              |
|              | Bo_8_1                            | 4x            | 2,58                       | 6,50                                         | 6,37                          | 4x            | 10x              |
|              | Bo_8_2                            | 4x            | 2,58                       | 7,74                                         | 7,58                          | 4x            | 12x              |
| Čavljak      | Ca_11_1                           | 4x            | 2,54                       | 7,84                                         | 7,69                          | 4x            | 12x              |
|              | Ca_11_2                           | 4x            | 2,57                       | 6,63                                         | 6,49                          | 4x            | 10x              |
|              | Ca_11_3                           | 4x            | 2,57                       | 7,14                                         | 7,00                          | 4x            | 11x              |
|              | Ca_11_5                           | 4x            | 2,56                       | 6,61                                         | 6,48                          | 4x            | 10x              |
|              | Ca_14_1                           | 4x            | 2,58                       | 7,64                                         | 7,49                          | 4x            | 12x              |
|              | Ca_14_2                           | 4x            | 2,58                       | 7,74                                         | 7,59                          | 4x            | 12x              |
|              | Ca_15_1                           | 4x            | 2,72                       | 7,98                                         | 7,82                          | 4x            | 12x              |
|              | Ca_15_10                          | 4x            | 2,45                       | 7,54                                         | 7,39                          | 4x            | 12x              |
|              | Ca_15_11                          | 4x            | 2,48                       | 7,54                                         | 7,39                          | 4x            | 12x              |
|              | Ca_15_12                          | 4x            | 2,55                       | 7,84                                         | 7,68                          | 4x            | 12x              |
|              | Ca_15_13                          | 4x            | 2,57                       | 4,00                                         | 3,92                          | 4x            | 6x               |
|              | Ca_15_14                          | 4x            | 2,51                       | 6,32                                         | 6,20                          | 4x            | 10x              |

|          |    |      |      |      |    |     |
|----------|----|------|------|------|----|-----|
| Ca_15_15 | 4x | 2,48 | 6,29 | 6,17 | 4x | 10x |
| Ca_15_16 | 4x | 2,58 | 6,69 | 6,56 | 4x | 10x |
| Ca_15_17 | 4x | 2,48 | 6,32 | 6,19 | 4x | 10x |
| Ca_15_18 | 4x | 2,55 | 7,84 | 7,68 | 4x | 12x |
| Ca_15_19 | 4x | 2,48 | 7,64 | 7,48 | 4x | 12x |
| Ca_15_2  | 4x | 2,41 | 7,43 | 7,29 | 4x | 12x |
| Ca_15_20 | 4x | 2,44 | 7,43 | 7,29 | 4x | 12x |
| Ca_15_21 | 4x | 2,48 | 7,63 | 7,48 | 4x | 12x |
| Ca_15_22 | 4x | 2,54 | 7,85 | 7,69 | 4x | 12x |
| Ca_15_23 | 4x | 2,54 | 7,74 | 7,58 | 4x | 12x |
| Ca_15_24 | 4x | 2,51 | 7,74 | 7,59 | 4x | 12x |
| Ca_15_25 | 4x | 2,54 | 7,85 | 7,69 | 4x | 12x |
| Ca_15_26 | 4x | 2,50 | 7,74 | 7,59 | 4x | 12x |
| Ca_15_27 | 4x | 2,44 | 7,43 | 7,28 | 4x | 12x |
| Ca_15_29 | 4x | 2,37 | 7,24 | 7,09 | 4x | 12x |
| Ca_15_3  | 4x | 2,51 | 7,74 | 7,58 | 4x | 12x |
| Ca_15_4  | 4x | 2,45 | 6,43 | 6,30 | 4x | 10x |
| Ca_15_5  | 4x | 2,49 | 7,66 | 7,51 | 4x | 12x |
| Ca_15_6  | 4x | 2,48 | 6,33 | 6,21 | 4x | 10x |
| Ca_15_7  | 4x | 2,55 | 7,86 | 7,70 | 4x | 12x |
| Ca_15_8  | 4x | 2,51 | 7,64 | 7,49 | 4x | 12x |
| Ca_15_9  | 4x | 2,48 | 7,65 | 7,50 | 4x | 12x |
| Ca_16_1  | 4x | 2,50 | 7,60 | 7,45 | 4x | 12x |
| Ca_16_10 | 4x | 2,57 | 7,80 | 7,64 | 4x | 12x |
| Ca_16_11 | 4x | 2,50 | 4,04 | 3,95 | 4x | 6x  |
| Ca_16_12 | 4x | 2,57 | 4,08 | 4,00 | 4x | 6x  |
| Ca_16_13 | 4x | 2,51 | 5,09 | 4,99 | 4x | 8x  |
| Ca_16_14 | 4x | 2,46 | 4,02 | 3,94 | 4x | 6x  |
| Ca_16_15 | 4x | 2,57 | 7,80 | 7,64 | 4x | 12x |
| Ca_16_16 | 4x | 2,65 | 7,95 | 7,79 | 4x | 12x |
| Ca_16_17 | 4x | 2,53 | 3,87 | 3,79 | 4x | 6x  |
| Ca_16_19 | 4x | 2,55 | 6,52 | 6,39 | 4x | 10x |
| Ca_16_2  | 4x | 2,61 | 7,40 | 7,25 | 4x | 11x |
| Ca_16_20 | 4x | 2,60 | 7,48 | 7,33 | 4x | 11x |
| Ca_16_21 | 4x | 2,42 | 6,46 | 6,33 | 4x | 10x |
| Ca_16_22 | 4x | 2,50 | 7,51 | 7,36 | 4x | 12x |
| Ca_16_3  | 4x | 2,55 | 7,65 | 7,49 | 4x | 12x |
| Ca_16_4  | 4x | 2,55 | 7,33 | 7,19 | 4x | 11x |
| Ca_16_5  | 4x | 2,48 | 7,53 | 7,38 | 4x | 12x |
| Ca_16_6  | 4x | 2,61 | 6,74 | 6,61 | 4x | 10x |
| Ca_16_7  | 4x | 2,57 | 7,31 | 7,16 | 4x | 11x |
| Ca_16_8  | 4x | 2,53 | 7,60 | 7,44 | 4x | 12x |
| Ca_16_9  | 4x | 2,48 | 7,53 | 7,38 | 4x | 12x |
| Ca_17_1  | 4x | 2,55 | 7,67 | 7,51 | 4x | 12x |
| Ca_17_10 | 4x | 2,55 | 7,70 | 7,55 | 4x | 12x |
| Ca_17_11 | 4x | 2,55 | 6,60 | 6,47 | 4x | 10x |
| Ca_17_12 | 4x | 3,77 | 6,51 | 6,38 | 6x | 10x |
| Ca_17_13 | 4x | 2,62 | 7,86 | 7,70 | 4x | 12x |
| Ca_17_14 | 4x | 2,53 | 7,69 | 7,53 | 4x | 12x |
| Ca_17_2  | 4x | 2,48 | 7,88 | 7,72 | 4x | 12x |
| Ca_17_3  | 4x | 2,47 | 7,51 | 7,36 | 4x | 12x |
| Ca_17_4  | 4x | 2,66 | 8,08 | 7,91 | 4x | 12x |
| Ca_17_5  | 4x | 2,48 | 6,52 | 6,39 | 4x | 10x |
| Ca_17_6  | 4x | 2,48 | 7,46 | 7,31 | 4x | 12x |
| Ca_17_7  | 4x | 2,52 | 7,57 | 7,42 | 4x | 12x |
| Ca_17_8  | 4x | 2,48 | 4,53 | 4,44 | 4x | 7x  |
| Ca_17_9  | 4x | 2,52 | 3,91 | 3,84 | 4x | 6x  |
| Ca_2_1   | 4x | 2,45 | 3,79 | 3,72 | 4x | 6x  |
| Ca_8_1   | 4x | 2,51 | 7,66 | 7,51 | 4x | 12x |
| Ca_8_2   | 4x | 2,48 | 7,44 | 7,29 | 4x | 12x |
| Ca_8_3   | 4x | 2,52 | 6,42 | 6,29 | 4x | 10x |
| Ca_8_4   | 4x | 2,62 | 4,00 | 3,92 | 4x | 6x  |

|                 |          |    |      |      |      |    |     |
|-----------------|----------|----|------|------|------|----|-----|
|                 | Ca_8_5   | 4x | 2,49 | 6,45 | 6,32 | 4x | 10x |
| Rotenfels       | Ro_1_1   | 4x | 2,55 | 5,12 | 5,02 | 4x | 8x  |
|                 | Ro_1_2   | 4x | 2,51 | 7,69 | 7,54 | 4x | 12x |
|                 | Ro_1_3   | 4x | 3,77 | 6,42 | 6,29 | 6x | 10x |
|                 | Ro_1_4   | 4x | 2,58 | 7,54 | 7,39 | 4x | 12x |
|                 | Ro_1_5   | 4x | 2,51 | 6,50 | 6,37 | 4x | 10x |
|                 | Ro_1_6   | 4x | 2,54 | 6,58 | 6,45 | 4x | 10x |
| Gornja grkarica | Go_10_1  | 4x | 2,66 | 6,87 | 6,73 | 4x | 10x |
|                 | Go_10_10 | 4x | 3,71 | 6,32 | 6,20 | 6x | 10x |
|                 | Go_10_11 | 4x | 2,50 | 6,51 | 6,38 | 4x | 10x |
|                 | Go_10_12 | 4x | 2,55 | 3,96 | 3,88 | 4x | 6x  |
|                 | Go_10_13 | 4x | 2,58 | 3,94 | 3,86 | 4x | 6x  |
|                 | Go_10_14 | 4x | 2,50 | 6,40 | 6,27 | 4x | 10x |
|                 | Go_10_15 | 4x | 2,48 | 3,84 | 3,77 | 4x | 6x  |
|                 | Go_10_16 | 4x | 2,55 | 5,37 | 5,27 | 4x | 8x  |
|                 | Go_10_17 | 4x | 2,62 | 6,76 | 6,63 | 4x | 10x |
|                 | Go_10_18 | 4x | 2,55 | 5,40 | 5,29 | 4x | 8x  |
|                 | Go_10_19 | 4x | 2,59 | 4,07 | 3,99 | 4x | 6x  |
|                 | Go_10_2  | 4x | 2,58 | 6,68 | 6,55 | 4x | 10x |
|                 | Go_10_20 | 4x | 2,53 | 6,59 | 6,46 | 4x | 10x |
|                 | Go_10_21 | 4x | 2,51 | 6,52 | 6,39 | 4x | 10x |
|                 | Go_10_22 | 4x | 2,58 | 4,06 | 3,98 | 4x | 6x  |
|                 | Go_10_23 | 4x | 2,55 | 6,62 | 6,49 | 4x | 10x |
|                 | Go_10_26 | 4x | 2,48 | 6,50 | 6,37 | 4x | 10x |
|                 | Go_10_27 | 4x | 2,54 | 4,00 | 3,92 | 4x | 6x  |
|                 | Go_10_28 | 4x | 2,58 | 6,69 | 6,56 | 4x | 10x |
|                 | Go_10_29 | 4x | 2,59 | 6,79 | 6,66 | 4x | 10x |
|                 | Go_10_3  | 4x | 2,65 | 6,73 | 6,60 | 4x | 10x |
|                 | Go_10_30 | 4x | 2,54 | 6,67 | 6,53 | 4x | 10x |
|                 | Go_10_31 | 4x | 2,59 | 7,27 | 7,12 | 4x | 11x |
|                 | Go_10_32 | 4x | 2,51 | 3,84 | 3,76 | 4x | 6x  |
|                 | Go_10_4  | 4x | 2,68 | 6,59 | 6,46 | 4x | 10x |
|                 | Go_10_5  | 4x | 2,58 | 4,00 | 3,92 | 4x | 6x  |
|                 | Go_10_6  | 4x | 2,58 | 6,71 | 6,58 | 4x | 10x |
|                 | Go_10_7  | 4x | 2,58 | 6,59 | 6,46 | 4x | 10x |
|                 | Go_10_8  | 4x | 2,40 | 3,68 | 3,61 | 4x | 6x  |
|                 | Go_10_9  | 4x | 2,55 | 3,90 | 3,82 | 4x | 6x  |
|                 | Go_11_1  | 4x | 2,54 | 4,23 | 4,14 | 4x | 7x  |
|                 | Go_11_10 | 4x | 2,58 | 6,48 | 6,35 | 4x | 10x |
|                 | Go_11_11 | 4x | 2,48 | 6,32 | 6,20 | 4x | 10x |
|                 | Go_11_13 | 4x | 2,58 | 5,17 | 5,07 | 4x | 8x  |
|                 | Go_11_14 | 4x | 3,75 | 6,56 | 6,43 | 6x | 10x |
|                 | Go_11_15 | 4x | 2,54 | 3,84 | 3,76 | 4x | 6x  |
|                 | Go_11_16 | 4x | 2,61 | 6,59 | 6,46 | 4x | 10x |
|                 | Go_11_17 | 4x | 2,50 | 6,32 | 6,19 | 4x | 10x |
|                 | Go_11_18 | 4x | 2,58 | 5,76 | 5,65 | 4x | 9x  |
|                 | Go_11_19 | 4x | 2,57 | 4,00 | 3,92 | 4x | 6x  |
|                 | Go_11_2  | 4x | 2,58 | 6,15 | 6,03 | 4x | 9x  |
|                 | Go_11_20 | 4x | 2,53 | 7,66 | 7,51 | 4x | 12x |
|                 | Go_11_21 | 4x | 2,51 | 7,69 | 7,54 | 4x | 12x |
|                 | Go_11_22 | 4x | 2,52 | 3,85 | 3,78 | 4x | 6x  |
|                 | Go_11_23 | 4x | 2,61 | 4,06 | 3,98 | 4x | 6x  |
|                 | Go_11_24 | 4x | 2,61 | 5,17 | 5,07 | 4x | 8x  |
|                 | Go_11_25 | 4x | 2,38 | 3,74 | 3,67 | 4x | 6x  |
|                 | Go_11_3  | 4x | 2,50 | 3,83 | 3,76 | 4x | 6x  |
|                 | Go_11_5  | 4x | 2,70 | 4,08 | 3,99 | 4x | 6x  |
|                 | Go_11_6  | 4x | 2,51 | 3,90 | 3,82 | 4x | 6x  |
|                 | Go_11_7  | 4x | 2,55 | 3,89 | 3,81 | 4x | 6x  |
|                 | Go_11_8  | 4x | 2,54 | 5,16 | 5,06 | 4x | 8x  |
|                 | Go_11_9  | 4x | 2,58 | 6,59 | 6,46 | 4x | 10x |
|                 | Go_14_1  | 4x | 2,58 | 3,94 | 3,87 | 4x | 6x  |

|                 |          |    |      |      |      |    |     |
|-----------------|----------|----|------|------|------|----|-----|
|                 | Go_14_10 | 4x | 2,54 | 3,95 | 3,87 | 4x | 6x  |
|                 | Go_14_3  | 4x | 2,58 | 5,10 | 5,00 | 4x | 8x  |
|                 | Go_14_4  | 4x | 2,54 | 4,11 | 4,03 | 4x | 6x  |
|                 | Go_14_5  | 4x | 2,55 | 5,31 | 5,20 | 4x | 8x  |
|                 | Go_14_6  | 4x | 2,58 | 4,40 | 4,31 | 4x | 7x  |
|                 | Go_14_7  | 4x | 2,54 | 4,96 | 4,86 | 4x | 8x  |
|                 | Go_14_8  | 4x | 2,54 | 4,51 | 4,42 | 4x | 7x  |
|                 | Go_14_9  | 4x | 2,51 | 4,57 | 4,48 | 4x | 7x  |
|                 | Go_15_1  | 4x | 2,61 | 6,67 | 6,53 | 4x | 10x |
|                 | Go_15_10 | 4x | 2,62 | 6,57 | 6,44 | 4x | 10x |
|                 | Go_15_11 | 4x | 2,61 | 5,32 | 5,21 | 4x | 8x  |
|                 | Go_15_12 | 4x | 2,63 | 3,90 | 3,83 | 4x | 6x  |
|                 | Go_15_13 | 4x | 2,58 | 6,67 | 6,53 | 4x | 10x |
|                 | Go_15_15 | 4x | 2,55 | 5,25 | 5,15 | 4x | 8x  |
|                 | Go_15_16 | 4x | 2,58 | 6,87 | 6,73 | 4x | 10x |
|                 | Go_15_17 | 4x | 2,58 | 3,90 | 3,82 | 4x | 6x  |
|                 | Go_15_18 | 4x | 2,62 | 6,69 | 6,56 | 4x | 10x |
|                 | Go_15_19 | 4x | 2,62 | 6,70 | 6,57 | 4x | 10x |
|                 | Go_15_2  | 4x | 2,63 | 6,97 | 6,83 | 4x | 10x |
|                 | Go_15_20 | 4x | 2,55 | 3,90 | 3,82 | 4x | 6x  |
|                 | Go_15_22 | 4x | 2,62 | 4,06 | 3,98 | 4x | 6x  |
|                 | Go_15_23 | 4x | 2,63 | 4,08 | 3,99 | 4x | 6x  |
|                 | Go_15_24 | 4x | 2,55 | 5,57 | 5,46 | 4x | 9x  |
|                 | Go_15_25 | 4x | 2,58 | 6,69 | 6,56 | 4x | 10x |
|                 | Go_15_26 | 4x | 2,49 | 3,74 | 3,66 | 4x | 6x  |
|                 | Go_15_27 | 4x | 2,59 | 4,01 | 3,93 | 4x | 6x  |
|                 | Go_15_29 | 4x | 2,45 | 3,79 | 3,72 | 4x | 6x  |
|                 | Go_15_3  | 4x | 2,78 | 5,22 | 5,11 | 4x | 7x  |
|                 | Go_15_30 | 4x | 2,59 | 6,61 | 6,48 | 4x | 10x |
|                 | Go_15_4  | 4x | 2,58 | 6,58 | 6,44 | 4x | 10x |
|                 | Go_15_5  | 4x | 2,54 | 3,95 | 3,87 | 4x | 6x  |
|                 | Go_15_6  | 4x | 2,58 | 6,76 | 6,63 | 4x | 10x |
|                 | Go_15_7  | 4x | 2,58 | 6,48 | 6,35 | 4x | 10x |
|                 | Go_15_8  | 4x | 2,44 | 3,74 | 3,66 | 4x | 6x  |
|                 | Go_15_9  | 4x | 2,67 | 6,97 | 6,83 | 4x | 10x |
|                 | Go_20_1  | 4x | 2,57 | 5,31 | 5,20 | 4x | 8x  |
|                 | Go_20_2  | 4x | 2,50 | 5,10 | 5,00 | 4x | 8x  |
|                 | Go_20_3  | 4x | 2,55 | 5,39 | 5,28 | 4x | 8x  |
|                 | Go_20_4  | 4x | 2,62 | 3,94 | 3,86 | 4x | 6x  |
|                 | Go_20_5  | 4x | 2,58 | 3,89 | 3,81 | 4x | 6x  |
|                 | Go_20_6  | 4x | 2,55 | 6,41 | 6,29 | 4x | 10x |
|                 | Go_20_7  | 4x | 2,54 | 5,09 | 4,99 | 4x | 8x  |
|                 | Go_20_8  | 4x | 2,57 | 6,40 | 6,27 | 4x | 10x |
| Monte Ventosola | Mo_1     | 4x | 2,73 | 6,59 | 6,46 | 4x | 9x  |
|                 | Mo_1_7   | 4x | 2,57 | 4,00 | 3,92 | 4x | 6x  |
|                 | Mo_1_8   | 4x | 2,54 | 3,95 | 3,87 | 4x | 6x  |
|                 | Mo_2     | 4x | 2,58 | 6,58 | 6,45 | 4x | 10x |
|                 | Mo_3     | 4x | 2,86 | 6,37 | 6,24 | 4x | 9x  |
|                 | Mo_4     | 4x | 2,67 | 6,86 | 6,72 | 4x | 10x |
|                 | Mo_5     | 4x | 3,77 | 6,60 | 6,47 | 6x | 10x |
|                 | Mo_6     | 4x | 2,51 | 6,41 | 6,28 | 4x | 10x |
| Mučanj          | Mu_1_1   | 4x | 2,57 | 7,73 | 7,58 | 4x | 12x |
|                 | Mu_1_2   | 4x | 2,58 | 7,74 | 7,58 | 4x | 12x |
|                 | Mu_1_3   | 4x | 2,58 | 6,58 | 6,45 | 4x | 10x |
|                 | Mu_1_4   | 4x | 2,58 | 7,96 | 7,80 | 4x | 12x |
|                 | Mu_1_5   | 4x | 2,58 | 7,96 | 7,80 | 4x | 12x |
|                 | Mu_1_7   | 4x | 2,58 | 6,59 | 6,46 | 4x | 10x |
|                 | Mu_1_8   | 4x | 2,50 | 6,40 | 6,27 | 4x | 10x |
|                 | Mu_4_10  | 4x | 2,43 | 5,05 | 4,95 | 4x | 8x  |
|                 | Mu_4_11  | 4x | 2,52 | 3,90 | 3,82 | 4x | 6x  |
|                 | Mu_4_13  | 4x | 2,48 | 4,97 | 4,87 | 4x | 8x  |

|               |               |        |      |      |      |      |     |     |
|---------------|---------------|--------|------|------|------|------|-----|-----|
|               | Mu_4_14       | 4x     | 2,55 | 5,38 | 5,27 | 4x   | 8x  |     |
|               | Mu_4_15       | 4x     | 2,50 | 5,96 | 5,85 | 4x   | 9x  |     |
|               | Mu_4_16       | 4x     | 2,57 | 6,55 | 6,42 | 4x   | 10x |     |
|               | Mu_4_17       | 4x     | 2,55 | 6,40 | 6,27 | 4x   | 10x |     |
|               | Mu_4_18       | 4x     | 2,48 | 7,43 | 7,28 | 4x   | 12x |     |
|               | Mu_4_19       | 4x     | 2,56 | 6,51 | 6,38 | 4x   | 10x |     |
|               | Mu_4_2        | 4x     | 2,54 | 4,51 | 4,42 | 4x   | 7x  |     |
|               | Mu_4_20       | 4x     | 2,54 | 7,55 | 7,40 | 4x   | 12x |     |
|               | Mu_4_21       | 4x     | 3,64 | 6,21 | 6,09 | 6x   | 10x |     |
|               | Mu_4_22       | 4x     | 2,37 | 7,27 | 7,13 | 4x   | 12x |     |
|               | Mu_4_23       | 4x     | 2,66 | 6,87 | 6,73 | 4x   | 10x |     |
|               | Mu_4_24       | 4x     | 2,53 | 7,69 | 7,53 | 4x   | 12x |     |
|               | Mu_4_25       | 4x     | 2,53 | 6,45 | 6,32 | 4x   | 10x |     |
|               | Mu_4_26       | 4x     | 3,69 | 6,29 | 6,16 | 6x   | 10x |     |
|               | Mu_4_27       | 4x     | 2,53 | 3,87 | 3,79 | 4x   | 6x  |     |
|               | Mu_4_29       | 4x     | 2,55 | 6,35 | 6,22 | 4x   | 10x |     |
|               | Mu_4_3        | 4x     | 2,55 | 6,49 | 6,36 | 4x   | 10x |     |
|               | Mu_4_30       | 4x     | 3,73 | 6,45 | 6,32 | 6x   | 10x |     |
|               | Mu_4_5        | 4x     | 2,55 | 3,87 | 3,79 | 4x   | 6x  |     |
|               | Mu_4_6        | 4x     | 2,48 | 6,67 | 6,53 | 4x   | 11x |     |
|               | Mu_4_7        | 4x     | 2,49 | 5,11 | 5,01 | 4x   | 8x  |     |
|               | Mu_4_8        | 4x     | 2,52 | 5,24 | 5,13 | 4x   | 8x  |     |
|               | Mu_4_9        | 4x     | 2,57 | 5,42 | 5,32 | 4x   | 8x  |     |
|               | Mu_7_1        | 4x     | 2,54 | 7,74 | 7,58 | 4x   | 12x |     |
|               | Mu_7_2        | 4x     | 2,58 | 6,58 | 6,45 | 4x   | 10x |     |
|               | Mu_7_3        | 4x     | 2,58 | 7,95 | 7,79 | 4x   | 12x |     |
|               | Rujište       | Ru_1_1 | 4x   | 2,51 | 6,60 | 6,47 | 4x  | 10x |
|               |               | Ru_2_1 | 4x   | 3,82 | 6,59 | 6,46 | 6x  | 10x |
|               |               | Ru_2_2 | 4x   | 2,61 | 4,00 | 3,92 | 4x  | 6x  |
|               |               | Ru_3_1 | 4x   | 2,58 | 6,50 | 6,37 | 4x  | 10x |
|               |               | Ru_3_2 | 4x   | 2,54 | 6,42 | 6,29 | 4x  | 10x |
|               |               | Ru_3_3 | 4x   | 2,61 | 7,35 | 7,20 | 4x  | 11x |
|               |               | Ru_3_4 | 4x   | 2,58 | 6,68 | 6,55 | 4x  | 10x |
| Ru_3_5        |               | 4x     | 2,55 | 7,35 | 7,20 | 4x   | 11x |     |
| Ru_3_6        |               | 4x     | 2,58 | 7,44 | 7,29 | 4x   | 11x |     |
| Ru_A_1        |               | 4x     | 2,58 | 3,90 | 3,82 | 4x   | 6x  |     |
| Ru_B_1        |               | 4x     | 2,45 | 3,85 | 3,77 | 4x   | 6x  |     |
| Ru_R_1        |               | 4x     | 2,48 | 3,85 | 3,77 | 4x   | 6x  |     |
| Ru_R_2        |               | 4x     | 2,58 | 7,14 | 7,00 | 4x   | 11x |     |
| Ru_R_3        |               | 4x     | 2,54 | 7,44 | 7,29 | 4x   | 12x |     |
| Ru_R_5        |               | 4x     | 2,55 | 6,52 | 6,39 | 4x   | 10x |     |
| Ru_R_6        |               | 4x     | 2,58 | 7,44 | 7,29 | 4x   | 11x |     |
| Sovička vrata | So_11_9_10_11 | 4x     | 2,51 | 3,79 | 3,72 | 4x   | 6x  |     |
|               | So_14_1       | 2x     | 1,22 | 1,86 | 1,82 | 2x   | 3x  |     |
| Puhova ravan  | Pu_1_1        | 4x     | 3,82 | 6,51 | 6,38 | 6x   | 10x |     |
|               | Pu_1_2        | 4x     | 2,54 | 7,65 | 7,49 | 4x   | 12x |     |
|               | Pu_1_3        | 4x     | 2,56 | 7,57 | 7,42 | 4x   | 12x |     |
|               | Pu_1_4        | 4x     | 2,52 | 6,35 | 6,23 | 4x   | 10x |     |
|               | Pu_10_1       | 4x     | 2,55 | 6,78 | 6,64 | 4x   | 10x |     |
|               | Pu_10_2       | 4x     | 2,34 | 3,48 | 3,41 | 4x   | 6x  |     |
|               | Pu_10_3       | 4x     | 2,56 | 7,69 | 7,53 | 4x   | 12x |     |
|               | Pu_10_4       | 4x     | 2,50 | 3,92 | 3,84 | 4x   | 6x  |     |
|               | Pu_10_5       | 4x     | 3,68 | 6,36 | 6,23 | 6x   | 10x |     |
|               | Pu_10_6       | 4x     | 2,55 | 3,85 | 3,77 | 4x   | 6x  |     |
|               | Pu_10_7       | 4x     | 3,68 | 6,53 | 6,40 | 6x   | 10x |     |
|               | Pu_10_8       | 4x     | 2,47 | 7,21 | 7,07 | 4x   | 11x |     |
|               | Pu_10_9       | 4x     | 2,59 | 3,90 | 3,82 | 4x   | 6x  |     |
|               | Pu_14_1       | 4x     | 2,54 | 7,06 | 6,92 | 4x   | 11x |     |
|               | Pu_14_10      | 4x     | 2,45 | 5,12 | 5,02 | 4x   | 8x  |     |
|               | Pu_14_11      | 4x     | 3,87 | 5,92 | 5,81 | 4x   | 6x  |     |
| Pu_14_12      | 4x            | 2,51   | 3,90 | 3,82 | 4x   | 6x   |     |     |

|          |          |    |      |      |      |    |     |
|----------|----------|----|------|------|------|----|-----|
|          | Pu_14_13 | 4x | 2,51 | 6,59 | 6,46 | 4x | 10x |
|          | Pu_14_14 | 4x | 2,60 | 6,71 | 6,58 | 4x | 10x |
|          | Pu_14_15 | 4x | 2,63 | 6,62 | 6,49 | 4x | 10x |
|          | Pu_14_2  | 4x | 3,77 | 6,50 | 6,37 | 6x | 10x |
|          | Pu_14_3  | 4x | 2,59 | 4,01 | 3,93 | 4x | 6x  |
|          | Pu_14_5  | 4x | 2,51 | 6,59 | 6,45 | 4x | 10x |
|          | Pu_14_6  | 4x | 2,58 | 6,87 | 6,73 | 4x | 10x |
|          | Pu_14_8  | 4x | 2,59 | 7,27 | 7,12 | 4x | 11x |
|          | Pu_14_9  | 4x | 2,59 | 6,60 | 6,47 | 4x | 10x |
|          | Pu_4_1   | 4x | 2,49 | 7,98 | 7,82 | 4x | 12x |
|          | Pu_4_10  | 4x | 2,55 | 7,84 | 7,68 | 4x | 12x |
|          | Pu_4_11  | 4x | 2,42 | 7,28 | 7,13 | 4x | 12x |
|          | Pu_4_2   | 4x | 2,48 | 3,85 | 3,77 | 4x | 6x  |
|          | Pu_4_3   | 4x | 2,52 | 6,61 | 6,48 | 4x | 10x |
|          | Pu_4_4   | 4x | 2,48 | 6,35 | 6,22 | 4x | 10x |
|          | Pu_4_5   | 4x | 2,52 | 7,57 | 7,42 | 4x | 12x |
|          | Pu_4_6   | 4x | 2,52 | 7,67 | 7,51 | 4x | 12x |
|          | Pu_4_7   | 4x | 2,63 | 4,08 | 3,99 | 4x | 6x  |
|          | Pu_4_8   | 4x | 2,45 | 6,44 | 6,31 | 4x | 10x |
|          | Pu_4_9   | 4x | 2,53 | 6,36 | 6,23 | 4x | 10x |
|          | Pu_8_1   | 4x | 2,48 | 6,76 | 6,63 | 4x | 11x |
|          | Pu_8_10  | 4x | 2,48 | 5,19 | 5,08 | 4x | 8x  |
|          | Pu_8_12  | 4x | 2,51 | 7,74 | 7,59 | 4x | 12x |
|          | Pu_8_13  | 4x | 2,51 | 3,84 | 3,77 | 4x | 6x  |
|          | Pu_8_14  | 4x | 2,51 | 7,74 | 7,58 | 4x | 12x |
|          | Pu_8_15  | 4x | 2,51 | 6,51 | 6,38 | 4x | 10x |
|          | Pu_8_16  | 4x | 2,48 | 5,68 | 5,57 | 4x | 9x  |
|          | Pu_8_17  | 4x | 2,54 | 7,65 | 7,49 | 4x | 12x |
|          | Pu_8_18  | 4x | 2,44 | 6,23 | 6,11 | 4x | 10x |
|          | Pu_8_19  | 4x | 2,48 | 6,40 | 6,27 | 4x | 10x |
|          | Pu_8_2   | 4x | 2,58 | 7,96 | 7,80 | 4x | 12x |
|          | Pu_8_3   | 4x | 3,66 | 6,41 | 6,28 | 6x | 10x |
|          | Pu_8_4   | 4x | 2,58 | 7,64 | 7,48 | 4x | 12x |
|          | Pu_8_5   | 4x | 2,51 | 3,89 | 3,82 | 4x | 6x  |
|          | Pu_8_6   | 4x | 2,47 | 7,64 | 7,49 | 4x | 12x |
|          | Pu_8_7   | 4x | 2,45 | 7,54 | 7,39 | 4x | 12x |
|          | Pu_8_8   | 4x | 2,48 | 6,42 | 6,29 | 4x | 10x |
|          | Pu_8_9   | 4x | 2,39 | 7,30 | 7,15 | 4x | 12x |
| Umoljani | Um_11A_1 | 4x | 2,55 | 6,35 | 6,22 | 4x | 10x |
|          | Um_11A_2 | 4x | 2,55 | 5,46 | 5,35 | 4x | 8x  |
|          | Um_11A_4 | 4x | 2,56 | 4,91 | 4,82 | 4x | 8x  |
|          | Um_12A_1 | 2x | 1,36 | 2,12 | 2,08 | 2x | 3x  |
|          | Um_12A_2 | 2x | 1,36 | 2,06 | 2,02 | 2x | 3x  |
|          | Um_12A_3 | 2x | 2,01 | 2,76 | 2,70 | 3x | 4x  |
|          | Um_12A_4 | 2x | 1,54 | 2,42 | 2,37 | 2x | 3x  |
|          | Um_12A_5 | 2x | 1,36 | 2,10 | 2,06 | 2x | 3x  |
|          | Um_13A_1 | 3x | 1,95 | 5,83 | 5,72 | 3x | 9x  |
|          | Um_13A_2 | 3x | 1,85 | 4,01 | 3,93 | 3x | 6x  |
|          | Um_1A_1  | 2x | 1,26 | 1,95 | 1,91 | 2x | 3x  |
|          | Um_1A_10 | 2x | 1,27 | 1,96 | 1,93 | 2x | 3x  |
|          | Um_1A_11 | 2x | 1,27 | 1,95 | 1,91 | 2x | 3x  |
|          | Um_1A_12 | 2x | 1,25 | 1,93 | 1,89 | 2x | 3x  |
|          | Um_1A_13 | 2x | 1,30 | 1,97 | 1,93 | 2x | 3x  |
|          | Um_1A_14 | 2x | 1,30 | 1,97 | 1,93 | 2x | 3x  |
|          | Um_1A_15 | 2x | 1,29 | 1,98 | 1,94 | 2x | 3x  |
|          | Um_1A_2  | 2x | 1,26 | 1,97 | 1,93 | 2x | 3x  |
|          | Um_1A_3  | 2x | 1,26 | 1,98 | 1,94 | 2x | 3x  |
|          | Um_1A_4  | 2x | 1,29 | 1,99 | 1,95 | 2x | 3x  |
|          | Um_1A_5  | 2x | 1,27 | 1,96 | 1,93 | 2x | 3x  |
|          | Um_1A_6  | 2x | 1,26 | 1,97 | 1,93 | 2x | 3x  |
|          | Um_1A_8  | 2x | 1,33 | 2,05 | 2,01 | 2x | 3x  |

|          |    |      |      |      |    |     |
|----------|----|------|------|------|----|-----|
| Um_1A_9  | 2x | 1,30 | 1,99 | 1,95 | 2x | 3x  |
| Um_1B_10 | 2x | 1,28 | 1,99 | 1,95 | 2x | 3x  |
| Um_1B_11 | 2x | 1,26 | 1,96 | 1,92 | 2x | 3x  |
| Um_1B_12 | 2x | 1,28 | 2,01 | 1,97 | 2x | 3x  |
| Um_1B_13 | 2x | 1,27 | 1,99 | 1,95 | 2x | 3x  |
| Um_1B_14 | 2x | 1,28 | 1,99 | 1,95 | 2x | 3x  |
| Um_1B_15 | 2x | 1,28 | 2,01 | 1,97 | 2x | 3x  |
| Um_1B_16 | 2x | 1,24 | 1,96 | 1,92 | 2x | 3x  |
| Um_1B_17 | 2x | 1,28 | 1,99 | 1,95 | 2x | 3x  |
| Um_1B_18 | 2x | 1,87 | 2,59 | 2,54 | 3x | 4x  |
| Um_1B_19 | 2x | 1,27 | 2,00 | 1,96 | 2x | 3x  |
| Um_1B_2  | 2x | 1,25 | 2,01 | 1,97 | 2x | 3x  |
| Um_1B_20 | 2x | 1,92 | 2,66 | 2,61 | 3x | 4x  |
| Um_1B_21 | 2x | 1,27 | 1,96 | 1,92 | 2x | 3x  |
| Um_1B_22 | 2x | 1,26 | 1,96 | 1,92 | 2x | 3x  |
| Um_1B_23 | 2x | 1,27 | 1,99 | 1,95 | 2x | 3x  |
| Um_1B_24 | 2x | 1,29 | 2,04 | 2,00 | 2x | 3x  |
| Um_1B_25 | 2x | 1,27 | 2,01 | 1,97 | 2x | 3x  |
| Um_1B_3  | 2x | 1,29 | 2,01 | 1,97 | 2x | 3x  |
| Um_1B_4  | 2x | 1,29 | 2,07 | 2,03 | 2x | 3x  |
| Um_1B_5  | 2x | 1,29 | 2,01 | 1,97 | 2x | 3x  |
| Um_1B_6  | 2x | 1,25 | 1,99 | 1,95 | 2x | 3x  |
| Um_1B_7  | 2x | 1,26 | 1,96 | 1,92 | 2x | 3x  |
| Um_1B_8  | 2x | 1,26 | 1,93 | 1,89 | 2x | 3x  |
| Um_1B_9  | 2x | 1,87 | 2,56 | 2,51 | 3x | 4x  |
| Um_2A_1  | 2x | 1,31 | 2,04 | 2,00 | 2x | 3x  |
| Um_2A_2  | 2x | 1,29 | 2,01 | 1,97 | 2x | 3x  |
| Um_2A_3  | 2x | 1,97 | 2,71 | 2,65 | 3x | 4x  |
| Um_2A_4  | 2x | 1,33 | 2,07 | 2,03 | 2x | 3x  |
| Um_2A_5  | 2x | 1,34 | 2,04 | 2,00 | 2x | 3x  |
| Um_2B_1  | 2x | 1,30 | 2,02 | 1,98 | 2x | 3x  |
| Um_2B_10 | 2x | 1,27 | 1,94 | 1,90 | 2x | 3x  |
| Um_2B_2  | 2x | 1,26 | 1,95 | 1,91 | 2x | 3x  |
| Um_2B_4  | 2x | 1,29 | 1,97 | 1,93 | 2x | 3x  |
| Um_2B_5  | 2x | 1,28 | 1,97 | 1,93 | 2x | 3x  |
| Um_2B_6  | 2x | 1,30 | 2,00 | 1,96 | 2x | 3x  |
| Um_2B_7  | 2x | 1,29 | 2,00 | 1,96 | 2x | 3x  |
| Um_2B_8  | 2x | 1,29 | 2,00 | 1,96 | 2x | 3x  |
| Um_2B_9  | 2x | 1,97 | 2,69 | 2,63 | 3x | 4x  |
| Um_3A_1  | 4x | 1,92 | 3,26 | 3,19 | 3x | 5x  |
| Um_3A_1  | 4x | 2,55 | 6,49 | 6,36 | 4x | 10x |
| Um_3A_2  | 4x | 2,58 | 6,41 | 6,28 | 4x | 10x |
| Um_3B_1  | 2x | 1,29 | 2,04 | 2,00 | 2x | 3x  |
| Um_3B_2  | 2x | 1,26 | 1,99 | 1,95 | 2x | 3x  |
| Um_3B_3  | 2x | 1,26 | 2,01 | 1,97 | 2x | 3x  |
| Um_3B_4  | 2x | 1,26 | 1,99 | 1,95 | 2x | 3x  |
| Um_3B_5  | 2x | 1,28 | 1,99 | 1,95 | 2x | 3x  |
| Um_3B_6  | 2x | 1,29 | 2,04 | 2,00 | 2x | 3x  |
| Um_4A    | 3x | 1,95 | 2,70 | 2,64 | 3x | 4x  |
| Um_4B_1  | 2x | 1,28 | 1,99 | 1,95 | 2x | 3x  |
| Um_4B_2  | 2x | 1,92 | 2,61 | 2,56 | 3x | 4x  |
| Um_4B_3  | 2x | 1,27 | 1,98 | 1,94 | 2x | 3x  |
| Um_4B_4  | 2x | 1,26 | 1,96 | 1,92 | 2x | 3x  |
| Um_4B_5  | 2x | 1,27 | 1,97 | 1,93 | 2x | 3x  |
| Um_4B_6  | 2x | 1,27 | 1,97 | 1,93 | 2x | 3x  |
| Um_4B_7  | 2x | 1,24 | 1,93 | 1,90 | 2x | 3x  |
| Um_4B_8  | 2x | 1,30 | 2,00 | 1,96 | 2x | 3x  |
| Um_5A_1  | 2x | 1,28 | 1,97 | 1,93 | 2x | 3x  |
| Um_5A_2  | 2x | 1,28 | 1,98 | 1,94 | 2x | 3x  |
| Um_5A_3  | 2x | 1,31 | 1,99 | 1,95 | 2x | 3x  |
| Um_5A_4  | 2x | 1,27 | 1,98 | 1,94 | 2x | 3x  |

|                   |          |    |      |      |      |    |     |
|-------------------|----------|----|------|------|------|----|-----|
|                   | Um_5A_5  | 2x | 1,31 | 2,02 | 1,98 | 2x | 3x  |
|                   | Um_5A_6  | 2x | 1,29 | 2,00 | 1,96 | 2x | 3x  |
|                   | Um_5A_7  | 2x | 1,27 | 1,97 | 1,93 | 2x | 3x  |
|                   | Um_5B_1  | 4x | 2,56 | 6,61 | 6,48 | 4x | 10x |
|                   | Um_5B_10 | 4x | 3,98 | 6,86 | 6,72 | 6x | 10x |
|                   | Um_5B_11 | 4x | 1,89 | 3,14 | 3,08 | 3x | 5x  |
|                   | Um_5B_2  | 4x | 2,55 | 6,64 | 6,50 | 4x | 10x |
|                   | Um_5B_3  | 4x | 2,56 | 7,98 | 7,82 | 4x | 12x |
|                   | Um_5B_4  | 4x | 2,56 | 7,75 | 7,60 | 4x | 12x |
|                   | Um_5B_5  | 4x | 3,98 | 6,78 | 6,64 | 6x | 10x |
|                   | Um_5B_6  | 4x | 2,54 | 6,51 | 6,38 | 4x | 10x |
|                   | Um_5B_7  | 4x | 2,52 | 6,51 | 6,38 | 4x | 10x |
|                   | Um_5B_8  | 4x | 2,54 | 7,86 | 7,70 | 4x | 12x |
|                   | Um_5B_9  | 4x | 2,52 | 7,65 | 7,49 | 4x | 12x |
|                   | Um_6A_10 | 4x | 2,54 | 6,33 | 6,20 | 4x | 10x |
|                   | Um_6A_11 | 4x | 2,48 | 6,24 | 6,12 | 4x | 10x |
|                   | Um_6A_11 | 4x | 2,41 | 4,77 | 4,67 | 4x | 8x  |
|                   | Um_6A_2  | 4x | 2,51 | 6,33 | 6,21 | 4x | 10x |
|                   | Um_6A_3  | 4x | 2,51 | 6,41 | 6,28 | 4x | 10x |
|                   | Um_6A_4  | 4x | 2,58 | 7,43 | 7,29 | 4x | 11x |
|                   | Um_6A_5  | 4x | 2,58 | 7,74 | 7,59 | 4x | 12x |
|                   | Um_6A_6  | 4x | 2,58 | 7,54 | 7,39 | 4x | 12x |
|                   | Um_6A_7  | 4x | 2,55 | 7,64 | 7,48 | 4x | 12x |
|                   | Um_6A_8  | 4x | 2,45 | 7,24 | 7,10 | 4x | 12x |
|                   | Um_6A_9  | 4x | 2,58 | 6,59 | 6,46 | 4x | 10x |
|                   | Um_7A    | 2x | 1,28 | 1,97 | 1,93 | 2x | 3x  |
|                   | Um_7B_1  | 2x | 1,25 | 1,94 | 1,91 | 2x | 3x  |
|                   | Um_7B_2  | 2x | 1,31 | 2,02 | 1,98 | 2x | 3x  |
|                   | Um_7B_3  | 2x | 1,29 | 1,98 | 1,94 | 2x | 3x  |
|                   | Um_7B_4  | 2x | 1,27 | 1,96 | 1,92 | 2x | 3x  |
|                   | Um_7B_5  | 2x | 1,28 | 1,99 | 1,95 | 2x | 3x  |
|                   | Um_7B_6  | 2x | 1,28 | 1,99 | 1,95 | 2x | 3x  |
|                   | Um_8B_1  | 2x | 1,28 | 2,01 | 1,97 | 2x | 3x  |
|                   | Um_8B_10 | 2x | 1,28 | 1,94 | 1,90 | 2x | 3x  |
|                   | Um_8B_11 | 2x | 1,32 | 2,04 | 2,00 | 2x | 3x  |
|                   | Um_8B_12 | 2x | 1,29 | 2,01 | 1,97 | 2x | 3x  |
|                   | Um_8B_13 | 2x | 1,31 | 2,01 | 1,97 | 2x | 3x  |
|                   | Um_8B_14 | 2x | 1,27 | 2,01 | 1,97 | 2x | 3x  |
|                   | Um_8B_15 | 2x | 1,42 | 2,15 | 2,11 | 2x | 3x  |
|                   | Um_8B_16 | 2x | 1,30 | 2,04 | 2,00 | 2x | 3x  |
|                   | Um_8B_17 | 2x | 1,33 | 2,02 | 1,98 | 2x | 3x  |
|                   | Um_8B_18 | 2x | 1,26 | 1,99 | 1,95 | 2x | 3x  |
|                   | Um_8B_19 | 2x | 1,32 | 1,99 | 1,95 | 2x | 3x  |
|                   | Um_8B_2  | 2x | 1,26 | 2,00 | 1,96 | 2x | 3x  |
|                   | Um_8B_20 | 2x | 1,27 | 2,01 | 1,97 | 2x | 3x  |
|                   | Um_8B_21 | 2x | 1,27 | 1,96 | 1,92 | 2x | 3x  |
|                   | Um_8B_22 | 2x | 1,90 | 2,65 | 2,59 | 3x | 4x  |
|                   | Um_8B_23 | 2x | 1,28 | 2,01 | 1,97 | 2x | 3x  |
|                   | Um_8B_24 | 2x | 1,32 | 2,01 | 1,97 | 2x | 3x  |
|                   | Um_8B_3  | 2x | 1,28 | 1,99 | 1,95 | 2x | 3x  |
|                   | Um_8B_4  | 2x | 1,28 | 1,99 | 1,95 | 2x | 3x  |
|                   | Um_8B_5  | 2x | 1,29 | 1,98 | 1,94 | 2x | 3x  |
|                   | Um_8B_6  | 2x | 1,27 | 2,01 | 1,97 | 2x | 3x  |
|                   | Um_8B_8  | 2x | 1,29 | 1,99 | 1,95 | 2x | 3x  |
|                   | Um_8B_9  | 2x | 1,27 | 1,99 | 1,95 | 2x | 3x  |
|                   | Um_9A_1  | 2x | 1,28 | 1,99 | 1,95 | 2x | 3x  |
|                   | Um_9A_2  | 2x | 1,28 | 1,99 | 1,95 | 2x | 3x  |
| Premužičeva staza | Pr_4_1   | 4x | 3,87 | 6,58 | 6,45 | 6x | 10x |
|                   | Pr_4_3   | 4x | 2,61 | 6,50 | 6,37 | 4x | 10x |
|                   | Pr_10_1  | 4x | 2,58 | 6,32 | 6,19 | 4x | 12x |
|                   | De_10_2  | 4x | 2,58 | 3,95 | 3,87 | 4x | 6x  |



|                    |          |    |      |      |      |    |     |
|--------------------|----------|----|------|------|------|----|-----|
| Devečanske stijene | De_10_3  | 4x | 2,58 | 5,38 | 5,27 | 4x | 8x  |
|                    | De_12_1  | 4x | 2,58 | 5,39 | 5,28 | 4x | 8x  |
|                    | De_13_1  | 4x | 2,55 | 6,79 | 6,65 | 6x | 10x |
|                    | De_13_2  | 4x | 2,54 | 3,90 | 3,82 | 4x | 6x  |
|                    | De_13_3  | 4x | 2,58 | 6,68 | 6,55 | 4x | 10x |
|                    | De_13_4  | 4x | 2,65 | 6,51 | 6,38 | 4x | 10x |
|                    | De_14_1  | 4x | 2,56 | 6,45 | 6,32 | 4x | 10x |
|                    | De_14_10 | 4x | 3,93 | 6,88 | 6,74 | 6x | 10x |
|                    | De_14_2  | 4x | 3,93 | 6,91 | 6,78 | 6x | 10x |
|                    | De_14_3  | 4x | 2,62 | 6,68 | 6,55 | 4x | 10x |
|                    | De_14_4  | 4x | 2,63 | 4,01 | 3,93 | 4x | 6x  |
|                    | De_14_5  | 4x | 2,62 | 4,28 | 4,19 | 4x | 6x  |
|                    | De_14_6  | 4x | 2,62 | 6,60 | 6,47 | 4x | 10x |
|                    | De_14_9  | 4x | 2,62 | 4,06 | 3,98 | 4x | 6x  |
|                    | De_15_1  | 4x | 2,54 | 6,51 | 6,38 | 4x | 10x |
|                    | De_15_10 | 4x | 2,54 | 7,74 | 7,59 | 4x | 12x |
|                    | De_15_11 | 4x | 2,58 | 7,74 | 7,59 | 4x | 12x |
|                    | De_15_12 | 4x | 2,51 | 7,73 | 7,58 | 4x | 12x |
|                    | De_15_13 | 4x | 2,55 | 3,90 | 3,82 | 4x | 6x  |
|                    | De_15_14 | 4x | 2,55 | 7,74 | 7,58 | 4x | 12x |
|                    | De_15_15 | 4x | 2,58 | 6,49 | 6,36 | 4x | 10x |
|                    | De_15_2  | 4x | 3,77 | 6,42 | 6,29 | 6x | 10x |
|                    | De_15_3  | 4x | 2,54 | 3,95 | 3,87 | 4x | 6x  |
|                    | De_15_4  | 4x | 2,55 | 6,49 | 6,36 | 4x | 10x |
|                    | De_15_5  | 4x | 2,58 | 6,58 | 6,44 | 4x | 10x |
|                    | De_15_6  | 4x | 2,44 | 3,95 | 3,87 | 4x | 6x  |
|                    | De_15_7  | 4x | 2,58 | 3,89 | 3,81 | 4x | 6x  |
|                    | De_15_8  | 4x | 2,58 | 3,95 | 3,87 | 4x | 6x  |
|                    | De_15_9  | 4x | 2,58 | 7,95 | 7,79 | 4x | 12x |
|                    | De_19_1  | 4x | 2,48 | 5,68 | 5,57 | 4x | 9x  |
|                    | De_19_2  | 4x | 2,55 | 6,60 | 6,47 | 4x | 10x |
|                    | De_19_3  | 4x | 2,58 | 6,41 | 6,28 | 4x | 10x |
|                    | De_19_4  | 4x | 2,65 | 7,95 | 7,79 | 4x | 12x |
|                    | De_19_5  | 4x | 2,60 | 7,48 | 7,33 | 4x | 10x |
|                    | De_19_6  | 4x | 2,55 | 7,64 | 7,49 | 4x | 12x |
|                    | De_19_7  | 4x | 2,52 | 6,42 | 6,29 | 4x | 10x |
|                    | De_1A_1  | 4x | 2,61 | 8,06 | 7,90 | 4x | 12x |
|                    | De_1A_2  | 4x | 2,57 | 4,00 | 3,92 | 4x | 6x  |
|                    | De_2_1   | 4x | 2,55 | 3,83 | 3,76 | 4x | 6x  |
|                    | De_2_2   | 4x | 2,62 | 7,05 | 6,91 | 4x | 11x |
|                    | De_2_3   | 4x | 2,54 | 7,44 | 7,29 | 4x | 12x |
|                    | De_2_4   | 4x | 2,55 | 7,26 | 7,11 | 4x | 11x |
|                    | De_2_5   | 4x | 2,62 | 5,39 | 5,28 | 4x | 8x  |
|                    | De_3A_1  | 4x | 2,65 | 6,76 | 6,62 | 4x | 10x |
|                    | De_4A_1  | 4x | 2,65 | 7,95 | 7,79 | 4x | 12x |
|                    | De_4A_2  | 4x | 2,58 | 3,95 | 3,87 | 4x | 6x  |
|                    | De_4B_1  | 2x | 1,42 | 1,93 | 1,89 | 2x | 3x  |
|                    | De_4B_3  | 2x | 1,34 | 2,01 | 1,97 | 2x | 3x  |
|                    | De_5A_1  | 4x | 2,65 | 4,05 | 3,97 | 4x | 6x  |
|                    | De_5A_2  | 4x | 2,55 | 7,84 | 7,69 | 4x | 12x |
|                    | De_5A_3  | 4x | 2,57 | 6,59 | 6,45 | 4x | 10x |
|                    | De_6A_1  | 4x | 2,64 | 6,67 | 6,54 | 4x | 10x |
|                    | De_7A_1  | 4x | 2,58 | 6,76 | 6,63 | 4x | 10x |
|                    | De_7A_2  | 4x | 2,64 | 4,00 | 3,92 | 4x | 6x  |
|                    | De_7A_3  | 4x | 2,55 | 3,89 | 3,82 | 4x | 6x  |
|                    | De_7A_4  | 4x | 2,61 | 7,96 | 7,80 | 4x | 12x |
|                    | De_7A_5  | 4x | 2,51 | 6,50 | 6,37 | 4x | 10x |
| Vošac              | Vo_1_1   | 4x | 2,58 | 6,49 | 6,36 | 4x | 10x |
|                    | Vo_1_2   | 4x | 2,58 | 6,30 | 6,18 | 4x | 10x |
|                    | Vo_1_3   | 4x | 2,41 | 3,84 | 3,77 | 4x | 6x  |
|                    | Vo_1_4   | 4x | 2,58 | 6,23 | 6,11 | 4x | 9x  |

|          |    |      |      |      |    |     |
|----------|----|------|------|------|----|-----|
| Vo_1_6   | 4x | 2,50 | 6,15 | 6,03 | 4x | 10x |
| Vo_11_1  | 4x | 2,54 | 7,74 | 7,58 | 4x | 12x |
| Vo_11_10 | 4x | 2,46 | 3,80 | 3,73 | 4x | 6x  |
| Vo_11_11 | 4x | 2,51 | 7,74 | 7,59 | 4x | 12x |
| Vo_11_12 | 4x | 2,51 | 3,90 | 3,82 | 4x | 6x  |
| Vo_11_13 | 4x | 2,51 | 3,84 | 3,76 | 4x | 6x  |
| Vo_11_14 | 4x | 2,48 | 6,26 | 6,13 | 4x | 10x |
| Vo_11_15 | 4x | 2,49 | 7,57 | 7,42 | 4x | 12x |
| Vo_11_16 | 4x | 2,50 | 6,46 | 6,34 | 4x | 10x |
| Vo_11_17 | 4x | 2,46 | 7,58 | 7,43 | 4x | 12x |
| Vo_11_18 | 4x | 2,51 | 7,16 | 7,02 | 4x | 11x |
| Vo_11_19 | 4x | 2,48 | 6,33 | 6,20 | 4x | 10x |
| Vo_11_20 | 4x | 2,46 | 6,36 | 6,23 | 4x | 10x |
| Vo_11_21 | 4x | 2,48 | 7,57 | 7,42 | 4x | 12x |
| Vo_11_22 | 4x | 2,51 | 7,74 | 7,59 | 4x | 12x |
| Vo_11_23 | 4x | 2,48 | 7,57 | 7,42 | 4x | 12x |
| Vo_11_24 | 4x | 2,51 | 7,74 | 7,59 | 4x | 12x |
| Vo_11_25 | 4x | 2,61 | 7,84 | 7,68 | 4x | 12x |
| Vo_11_26 | 4x | 2,48 | 7,65 | 7,49 | 4x | 12x |
| Vo_11_27 | 4x | 2,54 | 7,74 | 7,58 | 4x | 12x |
| Vo_11_28 | 4x | 2,52 | 6,42 | 6,29 | 4x | 10x |
| Vo_11_29 | 4x | 2,54 | 7,74 | 7,58 | 4x | 12x |
| Vo_11_3  | 4x | 2,58 | 6,32 | 6,19 | 4x | 10x |
| Vo_11_30 | 4x | 2,51 | 7,14 | 7,00 | 4x | 11x |
| Vo_11_31 | 4x | 2,54 | 7,44 | 7,29 | 4x | 12x |
| Vo_11_4  | 4x | 2,58 | 7,54 | 7,39 | 4x | 12x |
| Vo_11_5  | 4x | 2,51 | 6,41 | 6,28 | 4x | 10x |
| Vo_11_6  | 4x | 2,51 | 6,08 | 5,96 | 4x | 10x |
| Vo_11_7  | 4x | 2,55 | 6,50 | 6,37 | 4x | 10x |
| Vo_11_8  | 4x | 2,54 | 7,85 | 7,69 | 4x | 12x |
| Vo_11_9  | 4x | 2,54 | 6,51 | 6,38 | 4x | 10x |
| Vo_12_1  | 4x | 2,61 | 7,84 | 7,68 | 4x | 12x |
| Vo_12_10 | 4x | 2,58 | 7,54 | 7,39 | 4x | 12x |
| Vo_12_11 | 4x | 2,55 | 7,84 | 7,68 | 4x | 12x |
| Vo_12_12 | 4x | 2,44 | 7,53 | 7,38 | 4x | 12x |
| Vo_12_13 | 4x | 2,51 | 6,32 | 6,19 | 4x | 10x |
| Vo_12_14 | 4x | 2,44 | 3,84 | 3,76 | 4x | 6x  |
| Vo_12_15 | 4x | 2,55 | 3,83 | 3,76 | 4x | 6x  |
| Vo_12_16 | 4x | 2,54 | 6,41 | 6,28 | 4x | 10x |
| Vo_12_17 | 4x | 2,61 | 4,00 | 3,92 | 4x | 6x  |
| Vo_12_18 | 4x | 2,61 | 8,07 | 7,91 | 4x | 12x |
| Vo_12_19 | 4x | 2,61 | 7,63 | 7,48 | 4x | 12x |
| Vo_12_2  | 4x | 2,57 | 7,84 | 7,68 | 4x | 12x |
| Vo_12_20 | 4x | 2,58 | 6,32 | 6,20 | 4x | 10x |
| Vo_12_3  | 4x | 2,55 | 4,00 | 3,92 | 4x | 9x  |
| Vo_12_4  | 4x | 2,58 | 6,41 | 6,28 | 4x | 10x |
| Vo_12_5  | 4x | 2,54 | 7,85 | 7,69 | 4x | 12x |
| Vo_12_6  | 4x | 2,57 | 6,59 | 6,45 | 4x | 10x |
| Vo_12_7  | 4x | 2,54 | 7,74 | 7,58 | 4x | 12x |
| Vo_12_9  | 4x | 2,54 | 7,54 | 7,39 | 4x | 12x |
| Vo_2_3   | 4x | 2,54 | 6,16 | 6,03 | 4x | 10x |
| Vo_3     | 4x | 2,62 | 8,01 | 7,85 | 4x | 12x |
| Vo_7_1   | 4x | 2,57 | 6,15 | 6,02 | 4x | 9x  |
| Vo_7_2   | 4x | 2,55 | 4,28 | 4,19 | 4x | 7x  |
