# Supplementary figures and images for: Genome Size, Cytotype Diversity and Reproductive Mode Variation of Cotoneaster integerrimus (Rosaceae) from the Balkans
Source: MDPI journal article supplement (doi:10.3390/plants10122798), 2021-12-17

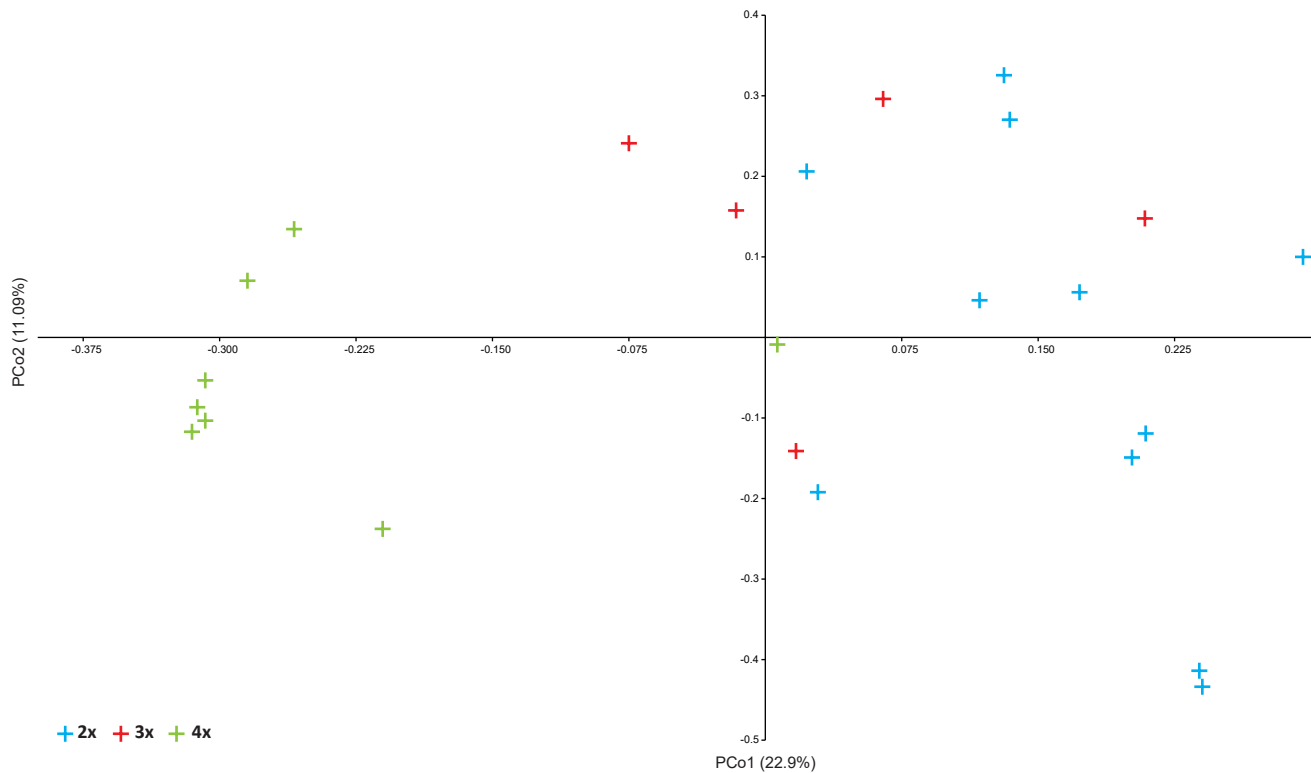

Supplement: s1 [file s1]
